# Supplementary material for: Time use and mental health in UK adults during an 11-week COVID-19 lockdown: a panel analysis
Source: PubMed Central journal article supplement (PMC8481937; doi:10.1192/bjp.2021.44), 2021-10
Supplement: S0007125021000441sup001.pdf [file S0007125021000441sup001.pdf]

## Supplementary Material

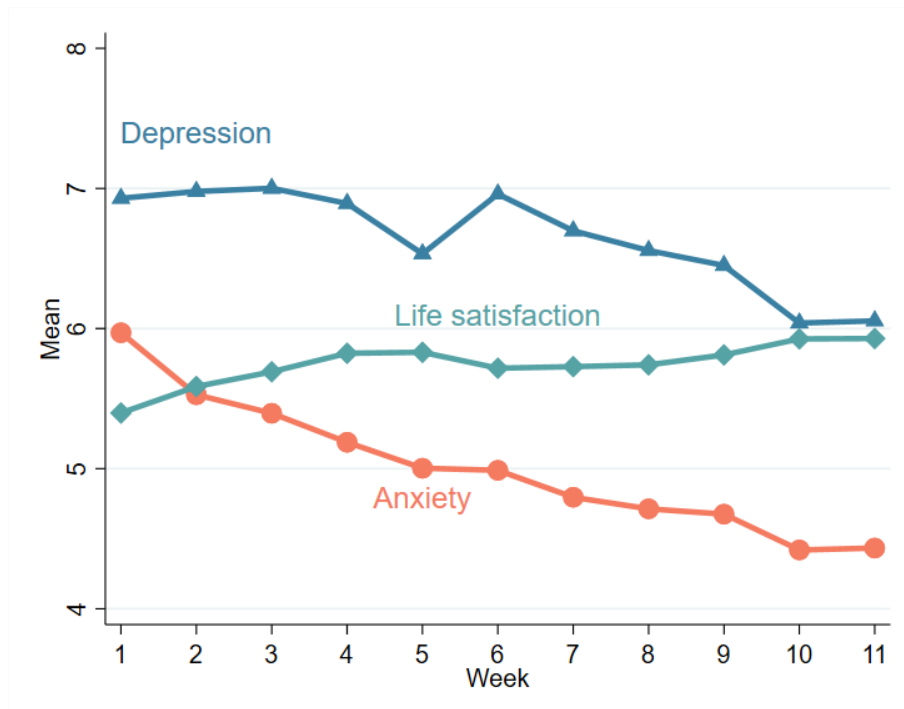

Figure S1. Descriptive changes of depression, anxiety and life satisfaction over time

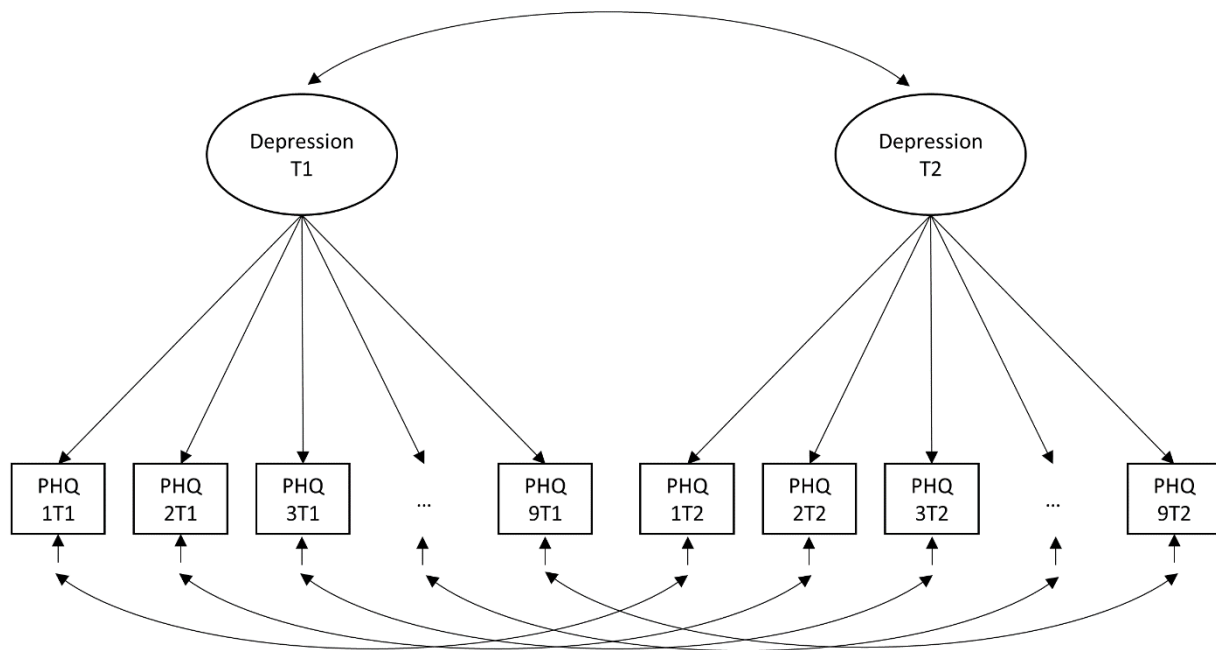

Figure S2. Model specification for testing longitudinal measurement invariance (depression)

|            | Estimate | S.E.  | Est./S.E. | Two-Tailed<br>P-Value |
|------------|----------|-------|-----------|-----------------------|
| DEP1 BY    |          |       |           |                       |
| PHQ1T1     | 1.000    | 0.000 | 999.000   | 999.000               |
| PHQ2T1     | 1.058    | 0.020 | 51.786    | 0.000                 |
| PHQ3T1     | 1.004    | 0.032 | 30.908    | 0.000                 |
| PHQ4T1     | 1.016    | 0.026 | 39.093    | 0.000                 |
| PHQ5T1     | 0.974    | 0.029 | 33.736    | 0.000                 |
| PHQ6T1     | 0.890    | 0.026 | 34.843    | 0.000                 |
| PHQ7T1     | 0.949    | 0.030 | 32.107    | 0.000                 |
| PHQ8T1     | 0.444    | 0.033 | 13.441    | 0.000                 |
| PHQ9T1     | 0.439    | 0.028 | 15.626    | 0.000                 |
| DEP2 BY    |          |       |           |                       |
| PHQ1T2     | 1.000    | 0.000 | 999.000   | 999.000               |
| PHQ2T2     | 1.043    | 0.014 | 76.586    | 0.000                 |
| PHQ3T2     | 1.031    | 0.023 | 44.119    | 0.000                 |
| PHQ4T2     | 1.051    | 0.021 | 49.280    | 0.000                 |
| PHQ5T2     | 0.884    | 0.026 | 33.372    | 0.000                 |
| PHQ6T2     | 0.904    | 0.023 | 39.876    | 0.000                 |
| PHQ7T2     | 0.946    | 0.026 | 37.083    | 0.000                 |
| PHQ8T2     | 0.375    | 0.022 | 17.408    | 0.000                 |
| PHQ9T2     | 0.423    | 0.024 | 17.633    | 0.000                 |
| Intercepts |          |       |           |                       |
| PHQ1T1     | 1.773    | 0.018 | 98.703    | 0.000                 |
| PHQ2T1     | 1.779    | 0.018 | 96.942    | 0.000                 |
| PHQ3T1     | 2.001    | 0.020 | 100.555   | 0.000                 |
| PHQ4T1     | 2.131    | 0.019 | 112.480   | 0.000                 |
| PHQ5T1     | 1.808    | 0.021 | 85.737    | 0.000                 |
| PHQ6T1     | 1.512    | 0.019 | 79.877    | 0.000                 |
| PHQ7T1     | 1.711    | 0.017 | 102.249   | 0.000                 |
| PHQ8T1     | 1.218    | 0.013 | 93.193    | 0.000                 |
| PHQ9T1     | 1.177    | 0.013 | 92.843    | 0.000                 |
| PHQ1T2     | 1.762    | 0.016 | 108.909   | 0.000                 |
| PHQ2T2     | 1.736    | 0.017 | 102.247   | 0.000                 |
| PHQ3T2     | 2.006    | 0.020 | 101.457   | 0.000                 |
| PHQ4T2     | 2.029    | 0.019 | 108.751   | 0.000                 |
| PHQ5T2     | 1.735    | 0.019 | 91.629    | 0.000                 |
| PHQ6T2     | 1.527    | 0.018 | 83.730    | 0.000                 |
| PHQ7T2     | 1.644    | 0.019 | 85.355    | 0.000                 |
| PHQ8T2     | 1.169    | 0.010 | 115.925   | 0.000                 |
| PHQ9T2     | 1.185    | 0.011 | 104.946   | 0.000                 |

Box S1. Results from the longitudinal confirmatory factor analysis model (configural invariance model)

Table S1 Comparing model fit indices across longitudinal factor analysis models

| Model                         | RMSEA | CFI   | SRMR  |
|-------------------------------|-------|-------|-------|
| Configural invariance         | 0.025 | 0.947 | 0.037 |
| Weak measurement invariance   | 0.025 | 0.946 | 0.039 |
| Strong measurement invariance | 0.025 | 0.943 | 0.039 |
| Strict measurement invariance | 0.028 | 0.922 | 0.055 |

Notes: RMSEA=root mean square error of approximation, CFI=comparative fit index, SRMR=standardized root mean square residual

Table S2. Demographic characteristics (N= 55,204 weighted)

|                  | Variables                | Percentages |
|------------------|--------------------------|-------------|
| Age              | 18-29                    | 18.4%       |
|                  | 30-45                    | 27.3%       |
|                  | 46-59                    | 24.4%       |
|                  | 60+                      | 29.9%       |
| Gender           | Women (vs. men)          | 50.0%       |
| Ethnicity        | BAME (vs. white)         | 12.5%       |
| Education        | GCSE or below            | 32.0%       |
|                  | A-levels or equivalent   | 33.5%       |
|                  | Degree or above          | 34.5%       |
| Household income | Low (<30k) (vs. high)    | 47.3%       |
| Area of living   | City                     | 34.4%       |
|                  | Large town               | 20.7%       |
|                  | Small town               | 24.6%       |
|                  | Village, hamlet or other | 20.3%       |
| Key worker role  | Key worker               | 22.5%       |

Note: all observed and unobserved time-invariant demographic characteristics are automatically accounted for in fixed-effects models but are shown here for descriptive purposes.

Table S3 Distribution of the time use variables at baseline (N=55,204 Weighted)

| Variables                            | Percentages |
|--------------------------------------|-------------|
| Working (<30mins)                    | 49.4%       |
| Working (30mins-2hrs)                | 10.9%       |
| Working (≥3hrs)                      | 39.7%       |
| Volunteering (none)                  | 91.7%       |
| Volunteering (<30mins)               | 3.6%        |
| Volunteering (≥30mins)               | 4.7%        |
| Housework (<30mins)                  | 26.2%       |
| Housework (30mins-2hrs)              | 49.2%       |
| Housework (≥3hrs)                    | 24.6%       |
| Looking after children (<30mins)     | 80.3%       |
| Looking after children (30mins-2hrs) | 8.0%        |
| Looking after children (≥3hrs)       | 11.7%       |
| Gardening (none)                     | 52.9%       |
| Gardening (<30mins)                  | 18.1%       |
| Gardening (≥30mins)                  | 29.0%       |
| Exercising (none)                    | 21.5%       |
| Exercising (<30mins)                 | 24.9%       |
| Exercising (≥30mins)                 | 53.6%       |
| Reading (none)                       | 44.6%       |
| Reading (<30mins)                    | 21.9%       |
| Reading (≥30mins)                    | 33.5%       |
| Hobby (none)                         | 48.2%       |
| Hobby (<30mins)                      | 18.0%       |
| Hobby (≥30mins)                      | 33.8%       |
| Communication (<30mins)              | 28.4%       |
| Communication (30mins-2hrs)          | 45.9%       |
| Communication (≥3hrs)                | 25.7%       |
| COVID-19 news (<30mins)              | 33.7%       |
| COVID-19 news (30mins-2hrs)          | 42.3%       |
| COVID-19 news (≥3hrs)                | 24.0%       |
| Watching TV (<30mins)                | 8.2%        |
| Watching TV (30mins-2hrs)            | 36.3%       |
| Watching TV (≥3hrs)                  | 55.5%       |
| Listening radio/music (<30mins)      | 27.1%       |
| Listening radio/music (30mins-2hrs)  | 49.0%       |
| Listening radio/music (≥3hrs)        | 23.9%       |
| Internet/social media (<30mins)      | 26.7%       |
| Internet/social media (30mins-2hrs)  | 44.5%       |
| Internet/social media (≥3hrs)        | 28.7%       |

Table S4 Results from the fixed-effects models on depression, anxiety and life satisfaction (excluding key workers)

|                                                   | Model I-i<br>Depression |      |       |                | Model II-i<br>Anxiety |      |       |                | Model III-i<br>Life satisfaction |      |       |                |
|---------------------------------------------------|-------------------------|------|-------|----------------|-----------------------|------|-------|----------------|----------------------------------|------|-------|----------------|
|                                                   | Coef.                   | SE   | p     | q <sup>†</sup> | Coef.                 | SE   | p     | q <sup>†</sup> | Coef.                            | SE   | p     | q <sup>†</sup> |
| Working 30mins-2hrs (Ref. <30mins)                | 0.00                    | 0.05 | 0.977 | 0.999          | 0.04                  | 0.04 | 0.368 | 0.581          | 0.01                             | 0.02 | 0.598 | 0.676          |
| Working ≥3hrs (Ref. <30mins)                      | -0.24                   | 0.05 | 0.000 | 0.000          | 0.09                  | 0.04 | 0.041 | 0.107          | 0.09                             | 0.02 | 0.000 | 0.000          |
| Volunteering <30mins (Ref. none)                  | 0.00                    | 0.07 | 0.999 | 0.999          | -0.06                 | 0.05 | 0.295 | 0.548          | 0.03                             | 0.03 | 0.278 | 0.344          |
| Volunteering ≥30mins (Ref. none)                  | -0.23                   | 0.11 | 0.046 | 0.075          | -0.12                 | 0.07 | 0.093 | 0.202          | 0.12                             | 0.04 | 0.009 | 0.020          |
| Housework 30mins-2hrs (Ref. <30mins)              | -0.10                   | 0.03 | 0.005 | 0.012          | -0.02                 | 0.03 | 0.427 | 0.617          | 0.03                             | 0.01 | 0.018 | 0.033          |
| Housework ≥3hrs (Ref. <30mins)                    | -0.20                   | 0.05 | 0.000 | 0.000          | -0.01                 | 0.05 | 0.785 | 0.816          | 0.04                             | 0.02 | 0.132 | 0.181          |
| Looking after children 30mins-2hrs (Ref. <30mins) | -0.01                   | 0.08 | 0.888 | 0.962          | 0.04                  | 0.08 | 0.669 | 0.758          | 0.05                             | 0.04 | 0.253 | 0.329          |
| Looking after children ≥3hrs (Ref. <30mins)       | 0.08                    | 0.11 | 0.466 | 0.577          | 0.19                  | 0.11 | 0.080 | 0.189          | 0.05                             | 0.06 | 0.422 | 0.499          |
| Gardening <30mins (Ref. none)                     | -0.16                   | 0.03 | 0.000 | 0.000          | -0.14                 | 0.03 | 0.000 | 0.000          | 0.05                             | 0.02 | 0.004 | 0.010          |
| Gardening ≥30mins (Ref. none)                     | -0.31                   | 0.04 | 0.000 | 0.000          | -0.23                 | 0.04 | 0.000 | 0.000          | 0.16                             | 0.02 | 0.000 | 0.000          |
| Exercising <30mins (Ref. none)                    | -0.14                   | 0.04 | 0.000 | 0.000          | 0.00                  | 0.04 | 0.921 | 0.921          | 0.09                             | 0.02 | 0.000 | 0.000          |
| Exercising ≥30mins (Ref. none)                    | -0.35                   | 0.04 | 0.000 | 0.000          | -0.19                 | 0.04 | 0.000 | 0.000          | 0.21                             | 0.02 | 0.000 | 0.000          |
| Reading <30mins (Ref. none)                       | -0.04                   | 0.04 | 0.317 | 0.434          | -0.02                 | 0.03 | 0.520 | 0.676          | 0.03                             | 0.02 | 0.120 | 0.173          |
| Reading ≥30mins (Ref. none)                       | -0.12                   | 0.05 | 0.013 | 0.024          | -0.16                 | 0.04 | 0.000 | 0.000          | 0.06                             | 0.02 | 0.005 | 0.012          |
| Hobby <30mins (Ref. none)                         | -0.04                   | 0.03 | 0.210 | 0.321          | 0.01                  | 0.03 | 0.683 | 0.758          | 0.03                             | 0.02 | 0.054 | 0.094          |
| Hobby ≥30mins (Ref. none)                         | -0.17                   | 0.03 | 0.000 | 0.000          | -0.08                 | 0.03 | 0.003 | 0.011          | 0.11                             | 0.02 | 0.000 | 0.000          |
| Communication 30mins-2hrs (Ref. <30mins)          | -0.08                   | 0.03 | 0.008 | 0.017          | 0.02                  | 0.03 | 0.547 | 0.677          | 0.04                             | 0.01 | 0.002 | 0.006          |
| Communication ≥3hrs (Ref. <30mins)                | -0.01                   | 0.05 | 0.882 | 0.962          | 0.11                  | 0.04 | 0.013 | 0.042          | 0.06                             | 0.02 | 0.010 | 0.020          |
| COVID-19 news 30mins-2hrs (Ref. <30mins)          | 0.27                    | 0.03 | 0.000 | 0.000          | 0.45                  | 0.03 | 0.000 | 0.000          | -0.12                            | 0.01 | 0.000 | 0.000          |
| COVID -19 news ≥3hrs (Ref. <30mins)               | 0.52                    | 0.05 | 0.000 | 0.000          | 0.84                  | 0.04 | 0.000 | 0.000          | -0.25                            | 0.02 | 0.000 | 0.000          |
| Watching TV 30mins-2hrs (Ref. <30mins)            | -0.02                   | 0.05 | 0.644 | 0.761          | -0.04                 | 0.05 | 0.380 | 0.581          | 0.01                             | 0.02 | 0.680 | 0.737          |
| Watching TV ≥3hrs (Ref. <30mins)                  | 0.13                    | 0.06 | 0.029 | 0.050          | 0.02                  | 0.06 | 0.700 | 0.758          | -0.05                            | 0.03 | 0.063 | 0.102          |
| Listening radio/music 30mins-2hrs (Ref. <30mins)  | -0.09                   | 0.04 | 0.012 | 0.024          | -0.02                 | 0.03 | 0.477 | 0.653          | 0.03                             | 0.02 | 0.082 | 0.125          |
| Listening radio/music ≥3hrs (Ref. <30mins)        | -0.25                   | 0.06 | 0.000 | 0.000          | -0.11                 | 0.05 | 0.020 | 0.058          | 0.08                             | 0.03 | 0.002 | 0.006          |
| Internet/social media 30mins-2hrs (Ref. <30mins)  | 0.02                    | 0.03 | 0.422 | 0.549          | -0.03                 | 0.03 | 0.237 | 0.474          | -0.01                            | 0.01 | 0.723 | 0.752          |
| Internet/social media ≥3hrs (Ref. <30mins)        | 0.06                    | 0.05 | 0.242 | 0.350          | -0.04                 | 0.04 | 0.363 | 0.581          | 0.01                             | 0.02 | 0.830 | 0.830          |
| Number of observations                            | 239,005                 |      |       |                | 239,005               |      |       |                | 239,005                          |      |       |                |
| Number of individuals                             | 41,728                  |      |       |                | 41,728                |      |       |                | 41,728                           |      |       |                |

Notes: q values are p values controlling for the positive false discovery rate.

Table S5 Results from the Arellano-Bond models on depression, anxiety and life satisfaction (excluding key workers)

|                                                   | Model I-ii<br>Depression |      |       |                | Model II-ii<br>Anxiety |      |       |                | Model III-ii<br>Life satisfaction |      |       |                |
|---------------------------------------------------|--------------------------|------|-------|----------------|------------------------|------|-------|----------------|-----------------------------------|------|-------|----------------|
|                                                   | Coef.                    | SE   | p     | q <sup>†</sup> | Coef.                  | SE   | p     | q <sup>†</sup> | Coef.                             | SE   | p     | q <sup>†</sup> |
| Working 30mins-2hrs (Ref. <30mins)                | 0.15                     | 0.38 | 0.685 | 0.971          | 0.29                   | 0.35 | 0.398 | 0.566          | -0.48                             | 0.18 | 0.007 | 0.032          |
| Working ≥3hrs (Ref. <30mins)                      | -0.04                    | 0.33 | 0.913 | 0.971          | 0.96                   | 0.29 | 0.001 | 0.005          | -0.30                             | 0.15 | 0.047 | 0.159          |
| Volunteering <30mins (Ref. none)                  | -0.05                    | 0.58 | 0.937 | 0.971          | -0.54                  | 0.61 | 0.380 | 0.566          | 0.15                              | 0.37 | 0.679 | 0.833          |
| Volunteering ≥30mins (Ref. none)                  | -0.03                    | 0.73 | 0.971 | 0.971          | -0.09                  | 0.53 | 0.873 | 0.928          | 0.34                              | 0.27 | 0.207 | 0.373          |
| Housework 30mins-2hrs (Ref. <30mins)              | 0.03                     | 0.30 | 0.934 | 0.971          | 0.04                   | 0.28 | 0.894 | 0.928          | -0.05                             | 0.15 | 0.736 | 0.839          |
| Housework ≥3hrs (Ref. <30mins)                    | -0.03                    | 0.49 | 0.948 | 0.971          | -0.44                  | 0.44 | 0.308 | 0.566          | 0.07                              | 0.25 | 0.776 | 0.839          |
| Looking after children 30mins-2hrs (Ref. <30mins) | 1.43                     | 0.79 | 0.069 | 0.155          | 1.66                   | 0.80 | 0.037 | 0.125          | -0.63                             | 0.39 | 0.108 | 0.208          |
| Looking after children ≥3hrs (Ref. <30mins)       | 0.91                     | 0.93 | 0.332 | 0.527          | 2.11                   | 0.95 | 0.026 | 0.117          | -1.36                             | 0.46 | 0.003 | 0.020          |
| Gardening <30mins (Ref. none)                     | -1.42                    | 0.32 | 0.000 | 0.000          | -1.02                  | 0.29 | 0.000 | 0.000          | 0.79                              | 0.16 | 0.000 | 0.000          |
| Gardening ≥30mins (Ref. none)                     | -1.43                    | 0.30 | 0.000 | 0.000          | -0.53                  | 0.27 | 0.049 | 0.146          | 1.10                              | 0.16 | 0.000 | 0.000          |
| Exercising <30mins (Ref. none)                    | -0.41                    | 0.37 | 0.265 | 0.477          | 0.28                   | 0.32 | 0.380 | 0.566          | 0.33                              | 0.19 | 0.087 | 0.208          |
| Exercising ≥30mins (Ref. none)                    | -0.96                    | 0.39 | 0.015 | 0.058          | 0.30                   | 0.33 | 0.369 | 0.566          | 0.49                              | 0.18 | 0.007 | 0.032          |
| Reading <30mins (Ref. none)                       | -0.33                    | 0.38 | 0.379 | 0.569          | -0.08                  | 0.33 | 0.812 | 0.928          | 0.30                              | 0.19 | 0.105 | 0.208          |
| Reading ≥30mins (Ref. none)                       | -1.06                    | 0.37 | 0.005 | 0.023          | -0.52                  | 0.33 | 0.116 | 0.285          | 0.46                              | 0.18 | 0.012 | 0.046          |
| Hobby <30mins (Ref. none)                         | 1.04                     | 0.35 | 0.003 | 0.016          | 0.67                   | 0.31 | 0.033 | 0.125          | -0.07                             | 0.16 | 0.667 | 0.833          |
| Hobby ≥30mins (Ref. none)                         | -0.02                    | 0.30 | 0.938 | 0.971          | 0.13                   | 0.29 | 0.650 | 0.798          | 0.09                              | 0.15 | 0.542 | 0.732          |
| Communication 30mins-2hrs (Ref. <30mins)          | 0.32                     | 0.30 | 0.292 | 0.493          | 0.05                   | 0.27 | 0.844 | 0.928          | 0.28                              | 0.15 | 0.058 | 0.174          |
| Communication ≥3hrs (Ref. <30mins)                | 0.62                     | 0.47 | 0.186 | 0.359          | -0.40                  | 0.41 | 0.330 | 0.566          | 0.20                              | 0.24 | 0.401 | 0.583          |
| COVID-19 news 30mins-2hrs (Ref. <30mins)          | 0.84                     | 0.19 | 0.000 | 0.000          | 1.20                   | 0.17 | 0.000 | 0.000          | -0.17                             | 0.09 | 0.069 | 0.186          |
| COVID -19 news ≥3hrs (Ref. <30mins)               | 0.70                     | 0.33 | 0.033 | 0.099          | 1.56                   | 0.28 | 0.000 | 0.000          | -0.26                             | 0.16 | 0.102 | 0.208          |
| Watching TV 30mins-2hrs (Ref. <30mins)            | -0.08                    | 0.48 | 0.865 | 0.971          | 0.24                   | 0.49 | 0.633 | 0.798          | -0.01                             | 0.25 | 0.965 | 0.965          |
| Watching TV ≥3hrs (Ref. <30mins)                  | 0.02                     | 0.55 | 0.967 | 0.971          | -0.32                  | 0.54 | 0.557 | 0.752          | -0.28                             | 0.28 | 0.325 | 0.516          |
| Listening radio/music 30mins-2hrs (Ref. <30mins)  | -0.72                    | 0.37 | 0.051 | 0.138          | -0.01                  | 0.32 | 0.974 | 0.974          | -0.05                             | 0.18 | 0.777 | 0.839          |
| Listening radio/music ≥3hrs (Ref. <30mins)        | -1.22                    | 0.52 | 0.020 | 0.068          | 0.90                   | 0.47 | 0.054 | 0.146          | 0.20                              | 0.24 | 0.410 | 0.583          |
| Internet/social media 30mins-2hrs (Ref. <30mins)  | 0.53                     | 0.33 | 0.107 | 0.222          | 0.26                   | 0.28 | 0.351 | 0.566          | -0.04                             | 0.16 | 0.820 | 0.852          |
| Internet/social media ≥3hrs (Ref. <30mins)        | 0.91                     | 0.50 | 0.066 | 0.155          | 0.38                   | 0.45 | 0.394 | 0.566          | -0.25                             | 0.24 | 0.295 | 0.498          |
| First lag of the outcome variable                 | 0.09                     | 0.02 | 0.000 | 0.000          | 0.17                   | 0.02 | 0.000 | 0.000          | 0.09                              | 0.01 | 0.000 | 0.000          |
| Number of observations                            | 125,211                  |      |       |                | 125,211                |      |       |                | 125,211                           |      |       |                |
| Number of individuals                             | 32,855                   |      |       |                | 32,855                 |      |       |                | 32,855                            |      |       |                |

Notes: q values are p values controlling for the positive false discovery rate.

Table S6 Results from the fixed-effects models on depression, anxiety and life satisfaction (key workers)

|                                                   | Model I-i<br>Depression |      |       |                | Model II-i<br>Anxiety |      |       |                | Model III-i<br>Life satisfaction |      |       |                |
|---------------------------------------------------|-------------------------|------|-------|----------------|-----------------------|------|-------|----------------|----------------------------------|------|-------|----------------|
|                                                   | Coef.                   | SE   | p     | q <sup>†</sup> | Coef.                 | SE   | p     | q <sup>†</sup> | Coef.                            | SE   | p     | q <sup>†</sup> |
| Working 30mins-2hrs (Ref. <30mins)                | -0.16                   | 0.10 | 0.106 | 0.159          | 0.03                  | 0.08 | 0.725 | 0.851          | 0.01                             | 0.05 | 0.767 | 0.928          |
| Working ≥3hrs (Ref. <30mins)                      | -0.36                   | 0.09 | 0.000 | 0.000          | 0.00                  | 0.06 | 0.955 | 0.955          | 0.14                             | 0.04 | 0.000 | 0.000          |
| Volunteering <30mins (Ref. none)                  | 0.01                    | 0.14 | 0.918 | 0.918          | 0.18                  | 0.11 | 0.104 | 0.201          | -0.15                            | 0.07 | 0.031 | 0.070          |
| Volunteering ≥30mins (Ref. none)                  | 0.11                    | 0.19 | 0.564 | 0.692          | 0.02                  | 0.14 | 0.864 | 0.897          | -0.01                            | 0.09 | 0.877 | 0.928          |
| Housework 30mins-2hrs (Ref. <30mins)              | -0.19                   | 0.06 | 0.002 | 0.006          | -0.08                 | 0.06 | 0.143 | 0.255          | 0.08                             | 0.03 | 0.004 | 0.012          |
| Housework ≥3hrs (Ref. <30mins)                    | -0.26                   | 0.10 | 0.012 | 0.025          | -0.12                 | 0.09 | 0.199 | 0.283          | 0.16                             | 0.05 | 0.001 | 0.003          |
| Looking after children 30mins-2hrs (Ref. <30mins) | -0.04                   | 0.13 | 0.731 | 0.789          | 0.15                  | 0.11 | 0.151 | 0.255          | 0.01                             | 0.06 | 0.872 | 0.928          |
| Looking after children ≥3hrs (Ref. <30mins)       | 0.05                    | 0.19 | 0.807 | 0.838          | 0.13                  | 0.16 | 0.418 | 0.537          | 0.06                             | 0.09 | 0.522 | 0.742          |
| Gardening <30mins (Ref. none)                     | -0.11                   | 0.07 | 0.102 | 0.159          | -0.20                 | 0.06 | 0.001 | 0.004          | 0.09                             | 0.03 | 0.010 | 0.027          |
| Gardening ≥30mins (Ref. none)                     | -0.28                   | 0.08 | 0.000 | 0.000          | -0.26                 | 0.07 | 0.000 | 0.000          | 0.18                             | 0.04 | 0.000 | 0.000          |
| Exercising <30mins (Ref. none)                    | -0.35                   | 0.09 | 0.000 | 0.000          | -0.12                 | 0.07 | 0.080 | 0.166          | 0.12                             | 0.04 | 0.001 | 0.003          |
| Exercising ≥30mins (Ref. none)                    | -0.50                   | 0.09 | 0.000 | 0.000          | -0.35                 | 0.07 | 0.000 | 0.000          | 0.26                             | 0.04 | 0.000 | 0.000          |
| Reading <30mins (Ref. none)                       | -0.19                   | 0.07 | 0.010 | 0.023          | -0.20                 | 0.07 | 0.005 | 0.015          | 0.03                             | 0.03 | 0.462 | 0.734          |
| Reading ≥30mins (Ref. none)                       | -0.22                   | 0.08 | 0.008 | 0.020          | -0.29                 | 0.07 | 0.000 | 0.000          | 0.02                             | 0.04 | 0.690 | 0.887          |
| Hobby <30mins (Ref. none)                         | -0.13                   | 0.07 | 0.070 | 0.126          | -0.07                 | 0.06 | 0.254 | 0.343          | 0.00                             | 0.03 | 0.973 | 0.973          |
| Hobby ≥30mins (Ref. none)                         | -0.18                   | 0.07 | 0.007 | 0.019          | -0.17                 | 0.06 | 0.008 | 0.022          | 0.02                             | 0.03 | 0.509 | 0.742          |
| Communication 30mins-2hrs (Ref. <30mins)          | 0.02                    | 0.06 | 0.697 | 0.784          | 0.12                  | 0.06 | 0.051 | 0.115          | 0.04                             | 0.03 | 0.142 | 0.274          |
| Communication ≥3hrs (Ref. <30mins)                | 0.04                    | 0.09 | 0.679 | 0.784          | 0.11                  | 0.08 | 0.170 | 0.270          | 0.04                             | 0.04 | 0.404 | 0.682          |
| COVID-19 news 30mins-2hrs (Ref. <30mins)          | 0.39                    | 0.05 | 0.000 | 0.000          | 0.62                  | 0.05 | 0.000 | 0.000          | -0.24                            | 0.02 | 0.000 | 0.000          |
| COVID -19 news ≥3hrs (Ref. <30mins)               | 0.71                    | 0.12 | 0.000 | 0.000          | 1.09                  | 0.10 | 0.000 | 0.000          | -0.43                            | 0.05 | 0.000 | 0.000          |
| Watching TV 30mins-2hrs (Ref. <30mins)            | -0.08                   | 0.10 | 0.429 | 0.552          | -0.02                 | 0.07 | 0.763 | 0.858          | 0.06                             | 0.04 | 0.214 | 0.385          |
| Watching TV ≥3hrs (Ref. <30mins)                  | 0.12                    | 0.11 | 0.297 | 0.401          | 0.02                  | 0.09 | 0.845 | 0.897          | -0.02                            | 0.06 | 0.665 | 0.887          |
| Listening radio/music 30mins-2hrs (Ref. <30mins)  | -0.11                   | 0.07 | 0.094 | 0.159          | -0.13                 | 0.06 | 0.029 | 0.071          | 0.05                             | 0.04 | 0.139 | 0.274          |
| Listening radio/music ≥3hrs (Ref. <30mins)        | -0.20                   | 0.10 | 0.041 | 0.079          | -0.05                 | 0.10 | 0.632 | 0.776          | 0.12                             | 0.05 | 0.025 | 0.061          |
| Internet/social media 30mins-2hrs (Ref. <30mins)  | 0.09                    | 0.07 | 0.174 | 0.247          | 0.08                  | 0.06 | 0.191 | 0.283          | -0.01                            | 0.03 | 0.821 | 0.928          |
| Internet/social media ≥3hrs (Ref. <30mins)        | 0.31                    | 0.10 | 0.002 | 0.006          | 0.27                  | 0.09 | 0.003 | 0.010          | -0.01                            | 0.04 | 0.894 | 0.928          |
| Number of observations                            | 69,177                  |      |       |                | 69,177                |      |       |                | 69,177                           |      |       |                |
| Number of individuals                             | 12,904                  |      |       |                | 12,904                |      |       |                | 12,904                           |      |       |                |

Notes: q values are p values controlling for the positive false discovery rate.

Table S7 Results from the Arellano-Bond models on depression, anxiety and life satisfaction (key workers)

|                                                   | Model I-ii<br>Depression |      |       |                | Model II-ii<br>Anxiety |      |       |                | Model III-ii<br>Life satisfaction |      |       |                |
|---------------------------------------------------|--------------------------|------|-------|----------------|------------------------|------|-------|----------------|-----------------------------------|------|-------|----------------|
|                                                   | Coef.                    | SE   | p     | q <sup>†</sup> | Coef.                  | SE   | p     | q <sup>†</sup> | Coef.                             | SE   | p     | q <sup>†</sup> |
| Working 30mins-2hrs (Ref. <30mins)                | -0.41                    | 0.46 | 0.369 | 0.712          | 0.61                   | 0.43 | 0.158 | 0.427          | -0.19                             | 0.21 | 0.374 | 0.837          |
| Working ≥3hrs (Ref. <30mins)                      | 0.31                     | 0.29 | 0.292 | 0.606          | 0.42                   | 0.25 | 0.091 | 0.351          | -0.21                             | 0.13 | 0.101 | 0.545          |
| Volunteering <30mins (Ref. none)                  | 0.01                     | 0.81 | 0.993 | 0.993          | 0.10                   | 0.69 | 0.887 | 0.993          | 0.01                              | 0.35 | 0.988 | 0.988          |
| Volunteering ≥30mins (Ref. none)                  | -1.22                    | 0.54 | 0.024 | 0.162          | 0.10                   | 0.67 | 0.882 | 0.993          | 0.74                              | 0.38 | 0.053 | 0.358          |
| Housework 30mins-2hrs (Ref. <30mins)              | 0.38                     | 0.33 | 0.255 | 0.574          | 0.29                   | 0.29 | 0.317 | 0.658          | 0.02                              | 0.15 | 0.908 | 0.988          |
| Housework ≥3hrs (Ref. <30mins)                    | 0.32                     | 0.44 | 0.464 | 0.783          | -0.01                  | 0.45 | 0.977 | 0.993          | 0.06                              | 0.25 | 0.812 | 0.988          |
| Looking after children 30mins-2hrs (Ref. <30mins) | 0.28                     | 0.53 | 0.601 | 0.818          | 0.46                   | 0.52 | 0.381 | 0.735          | 0.23                              | 0.26 | 0.372 | 0.837          |
| Looking after children ≥3hrs (Ref. <30mins)       | 0.28                     | 0.66 | 0.671 | 0.818          | 1.47                   | 0.72 | 0.043 | 0.232          | -0.03                             | 0.31 | 0.924 | 0.988          |
| Gardening <30mins (Ref. none)                     | -0.28                    | 0.35 | 0.421 | 0.758          | -0.50                  | 0.35 | 0.149 | 0.427          | 0.27                              | 0.19 | 0.144 | 0.648          |
| Gardening ≥30mins (Ref. none)                     | -0.54                    | 0.39 | 0.161 | 0.435          | -0.82                  | 0.36 | 0.022 | 0.149          | 0.38                              | 0.19 | 0.042 | 0.358          |
| Exercising <30mins (Ref. none)                    | -0.05                    | 0.37 | 0.890 | 0.961          | -0.02                  | 0.35 | 0.953 | 0.993          | 0.20                              | 0.17 | 0.256 | 0.768          |
| Exercising ≥30mins (Ref. none)                    | -0.20                    | 0.38 | 0.594 | 0.818          | 0.23                   | 0.33 | 0.485 | 0.818          | 0.06                              | 0.18 | 0.735 | 0.988          |
| Reading <30mins (Ref. none)                       | 0.23                     | 0.46 | 0.618 | 0.818          | 0.30                   | 0.38 | 0.431 | 0.776          | -0.11                             | 0.19 | 0.568 | 0.945          |
| Reading ≥30mins (Ref. none)                       | 0.23                     | 0.46 | 0.616 | 0.818          | 0.64                   | 0.40 | 0.111 | 0.375          | -0.03                             | 0.21 | 0.904 | 0.988          |
| Hobby <30mins (Ref. none)                         | -0.58                    | 0.35 | 0.097 | 0.306          | -0.35                  | 0.31 | 0.251 | 0.565          | -0.14                             | 0.17 | 0.403 | 0.837          |
| Hobby ≥30mins (Ref. none)                         | 0.16                     | 0.36 | 0.664 | 0.818          | 0.07                   | 0.30 | 0.828 | 0.993          | -0.12                             | 0.16 | 0.469 | 0.844          |
| Communication 30mins-2hrs (Ref. <30mins)          | 0.47                     | 0.29 | 0.102 | 0.306          | -0.05                  | 0.27 | 0.844 | 0.993          | 0.07                              | 0.16 | 0.655 | 0.983          |
| Communication ≥3hrs (Ref. <30mins)                | -0.04                    | 0.41 | 0.929 | 0.965          | -0.12                  | 0.40 | 0.766 | 0.993          | 0.27                              | 0.23 | 0.232 | 0.768          |
| COVID-19 news 30mins-2hrs (Ref. <30mins)          | 0.73                     | 0.26 | 0.005 | 0.068          | 1.19                   | 0.27 | 0.000 | 0.000          | -0.53                             | 0.12 | 0.000 | 0.000          |
| COVID -19 news ≥3hrs (Ref. <30mins)               | 1.85                     | 0.46 | 0.000 | 0.000          | 1.75                   | 0.41 | 0.000 | 0.000          | -0.91                             | 0.20 | 0.000 | 0.000          |
| Watching TV 30mins-2hrs (Ref. <30mins)            | -0.19                    | 0.49 | 0.697 | 0.818          | -0.10                  | 0.41 | 0.802 | 0.993          | -0.17                             | 0.22 | 0.441 | 0.844          |
| Watching TV ≥3hrs (Ref. <30mins)                  | 0.11                     | 0.58 | 0.847 | 0.953          | 0.15                   | 0.51 | 0.765 | 0.993          | -0.10                             | 0.26 | 0.713 | 0.988          |
| Listening radio/music 30mins-2hrs (Ref. <30mins)  | -0.54                    | 0.32 | 0.093 | 0.306          | -0.56                  | 0.30 | 0.061 | 0.275          | -0.19                             | 0.20 | 0.339 | 0.837          |
| Listening radio/music ≥3hrs (Ref. <30mins)        | -0.88                    | 0.51 | 0.083 | 0.306          | -0.57                  | 0.46 | 0.217 | 0.533          | -0.33                             | 0.26 | 0.210 | 0.768          |
| Internet/social media 30mins-2hrs (Ref. <30mins)  | 0.44                     | 0.37 | 0.236 | 0.574          | 0.00                   | 0.36 | 0.993 | 0.993          | 0.09                              | 0.17 | 0.595 | 0.945          |
| Internet/social media ≥3hrs (Ref. <30mins)        | 0.99                     | 0.50 | 0.048 | 0.259          | 0.12                   | 0.44 | 0.780 | 0.993          | -0.01                             | 0.25 | 0.955 | 0.988          |
| First lag of the outcome variable                 | 0.07                     | 0.03 | 0.015 | 0.135          | 0.14                   | 0.03 | 0.000 | 0.000          | 0.01                              | 0.02 | 0.772 | 0.988          |
| Number of observations                            | 34,259                   |      |       |                | 34,259                 |      |       |                | 34,259                            |      |       |                |
| Number of individuals                             | 9,545                    |      |       |                | 9,545                  |      |       |                | 9,545                             |      |       |                |

Notes: q values are p values controlling for the positive false discovery rate.



Table S8 Results from the fixed-effects models on depression (controlling for anxiety) and anxiety (controlling for depression)

|                                                   | Model I-i<br>Depression |      |       |       | Model II-i<br>Anxiety |      |       |       |
|---------------------------------------------------|-------------------------|------|-------|-------|-----------------------|------|-------|-------|
|                                                   | Coef.                   | SE   | p     | q†    | Coef.                 | SE   | p     | q†    |
| Working 30mins-2hrs (Ref. <30mins)                | -0.05                   | 0.04 | 0.178 | 0.253 | 0.05                  | 0.03 | 0.123 | 0.255 |
| Working ≥3hrs (Ref. <30mins)                      | -0.31                   | 0.03 | 0.000 | 0.000 | 0.19                  | 0.03 | 0.000 | 0.000 |
| Volunteering <30mins (Ref. none)                  | 0.01                    | 0.06 | 0.851 | 0.851 | -0.01                 | 0.05 | 0.769 | 0.799 |
| Volunteering ≥30mins (Ref. none)                  | -0.11                   | 0.08 | 0.162 | 0.243 | -0.01                 | 0.04 | 0.754 | 0.799 |
| Housework 30mins-2hrs (Ref. <30mins)              | -0.09                   | 0.02 | 0.000 | 0.000 | 0.02                  | 0.02 | 0.392 | 0.504 |
| Housework ≥3hrs (Ref. <30mins)                    | -0.19                   | 0.04 | 0.000 | 0.000 | 0.06                  | 0.03 | 0.061 | 0.137 |
| Looking after children 30mins-2hrs (Ref. <30mins) | -0.07                   | 0.06 | 0.272 | 0.350 | 0.08                  | 0.06 | 0.142 | 0.274 |
| Looking after children ≥3hrs (Ref. <30mins)       | -0.03                   | 0.08 | 0.746 | 0.775 | 0.14                  | 0.07 | 0.057 | 0.137 |
| Gardening <30mins (Ref. none)                     | -0.06                   | 0.03 | 0.018 | 0.035 | -0.08                 | 0.02 | 0.000 | 0.000 |
| Gardening ≥30mins (Ref. none)                     | -0.17                   | 0.03 | 0.000 | 0.000 | -0.09                 | 0.03 | 0.001 | 0.003 |
| Exercising <30mins (Ref. none)                    | -0.17                   | 0.03 | 0.000 | 0.000 | 0.06                  | 0.03 | 0.018 | 0.049 |
| Exercising ≥30mins (Ref. none)                    | -0.26                   | 0.03 | 0.000 | 0.000 | -0.04                 | 0.03 | 0.177 | 0.309 |
| Reading <30mins (Ref. none)                       | -0.04                   | 0.03 | 0.231 | 0.312 | -0.02                 | 0.03 | 0.341 | 0.485 |
| Reading ≥30mins (Ref. none)                       | -0.03                   | 0.03 | 0.403 | 0.473 | -0.12                 | 0.03 | 0.000 | 0.000 |
| Hobby <30mins (Ref. none)                         | -0.06                   | 0.03 | 0.030 | 0.054 | 0.02                  | 0.02 | 0.288 | 0.432 |
| Hobby ≥30mins (Ref. none)                         | -0.11                   | 0.02 | 0.000 | 0.000 | -0.02                 | 0.02 | 0.450 | 0.552 |
| Communication 30mins-2hrs (Ref. <30mins)          | -0.08                   | 0.02 | 0.001 | 0.003 | 0.06                  | 0.02 | 0.003 | 0.009 |
| Communication ≥3hrs (Ref. <30mins)                | -0.06                   | 0.04 | 0.091 | 0.145 | 0.11                  | 0.03 | 0.001 | 0.003 |
| COVID-19 news 30mins-2hrs (Ref. <30mins)          | 0.01                    | 0.02 | 0.579 | 0.651 | 0.34                  | 0.02 | 0.000 | 0.000 |
| COVID -19 news ≥3hrs (Ref. <30mins)               | 0.04                    | 0.04 | 0.302 | 0.371 | 0.62                  | 0.03 | 0.000 | 0.000 |
| Watching TV 30mins-2hrs (Ref. <30mins)            | -0.01                   | 0.03 | 0.684 | 0.739 | -0.02                 | 0.03 | 0.576 | 0.648 |
| Watching TV ≥3hrs (Ref. <30mins)                  | 0.12                    | 0.04 | 0.006 | 0.015 | -0.04                 | 0.04 | 0.285 | 0.432 |
| Listening radio/music 30mins-2hrs (Ref. <30mins)  | -0.07                   | 0.03 | 0.012 | 0.025 | 0.00                  | 0.02 | 0.953 | 0.953 |
| Listening radio/music ≥3hrs (Ref. <30mins)        | -0.18                   | 0.04 | 0.000 | 0.000 | 0.02                  | 0.04 | 0.503 | 0.590 |
| Internet/social media 30mins-2hrs (Ref. <30mins)  | 0.04                    | 0.02 | 0.052 | 0.088 | -0.03                 | 0.02 | 0.183 | 0.309 |
| Internet/social media ≥3hrs (Ref. <30mins)        | 0.09                    | 0.04 | 0.010 | 0.023 | -0.03                 | 0.03 | 0.368 | 0.497 |
| Depression/anxiety                                | 0.58                    | 0.01 | 0.000 | 0.000 | 0.49                  | 0.00 | 0.000 | 0.000 |
| Number of observations                            | 239,005                 |      |       |       | 239,005               |      |       |       |
| Number of individuals                             | 41,728                  |      |       |       | 41,728                |      |       |       |

Notes: q values are p values controlling for the positive false discovery rate.

Table S9 Results from the fixed-effects models on depression, anxiety and life satisfaction (restricting to participants with at least three repeated measures)

|                                                   | Model I-i<br>Depression |      |       |                | Model II-i<br>Anxiety |      |       |                | Model III-i<br>Life satisfaction |      |       |                |
|---------------------------------------------------|-------------------------|------|-------|----------------|-----------------------|------|-------|----------------|----------------------------------|------|-------|----------------|
|                                                   | Coef.                   | SE   | p     | q <sup>†</sup> | Coef.                 | SE   | p     | q <sup>†</sup> | Coef.                            | SE   | p     | q <sup>†</sup> |
| Working 30mins-2hrs (Ref. <30mins)                | -0.04                   | 0.04 | 0.334 | 0.410          | 0.04                  | 0.04 | 0.308 | 0.438          | 0.02                             | 0.02 | 0.322 | 0.395          |
| Working ≥3hrs (Ref. <30mins)                      | -0.27                   | 0.04 | 0.000 | 0.000          | 0.06                  | 0.04 | 0.109 | 0.210          | 0.11                             | 0.02 | 0.000 | 0.000          |
| Volunteering <30mins (Ref. none)                  | 0.00                    | 0.06 | 0.956 | 0.956          | -0.02                 | 0.05 | 0.695 | 0.722          | -0.01                            | 0.03 | 0.747 | 0.835          |
| Volunteering ≥30mins (Ref. none)                  | -0.16                   | 0.10 | 0.098 | 0.139          | -0.10                 | 0.06 | 0.140 | 0.252          | 0.06                             | 0.04 | 0.137 | 0.195          |
| Housework 30mins-2hrs (Ref. <30mins)              | -0.10                   | 0.03 | 0.000 | 0.000          | -0.03                 | 0.03 | 0.242 | 0.384          | 0.05                             | 0.01 | 0.000 | 0.000          |
| Housework ≥3hrs (Ref. <30mins)                    | -0.19                   | 0.05 | 0.000 | 0.000          | -0.03                 | 0.04 | 0.459 | 0.574          | 0.06                             | 0.02 | 0.004 | 0.008          |
| Looking after children 30mins-2hrs (Ref. <30mins) | -0.02                   | 0.07 | 0.820 | 0.858          | 0.08                  | 0.07 | 0.226 | 0.381          | 0.01                             | 0.03 | 0.744 | 0.835          |
| Looking after children ≥3hrs (Ref. <30mins)       | 0.04                    | 0.10 | 0.646 | 0.727          | 0.16                  | 0.09 | 0.083 | 0.172          | 0.01                             | 0.04 | 0.841 | 0.850          |
| Gardening <30mins (Ref. none)                     | -0.15                   | 0.03 | 0.000 | 0.000          | -0.15                 | 0.03 | 0.000 | 0.000          | 0.05                             | 0.02 | 0.001 | 0.002          |
| Gardening ≥30mins (Ref. none)                     | -0.32                   | 0.03 | 0.000 | 0.000          | -0.24                 | 0.03 | 0.000 | 0.000          | 0.16                             | 0.02 | 0.000 | 0.000          |
| Exercising <30mins (Ref. none)                    | -0.19                   | 0.04 | 0.000 | 0.000          | -0.02                 | 0.03 | 0.587 | 0.689          | 0.10                             | 0.02 | 0.000 | 0.000          |
| Exercising ≥30mins (Ref. none)                    | -0.39                   | 0.04 | 0.000 | 0.000          | -0.24                 | 0.03 | 0.000 | 0.000          | 0.22                             | 0.02 | 0.000 | 0.000          |
| Reading <30mins (Ref. none)                       | -0.07                   | 0.03 | 0.046 | 0.069          | -0.06                 | 0.03 | 0.055 | 0.135          | 0.03                             | 0.02 | 0.107 | 0.170          |
| Reading ≥30mins (Ref. none)                       | -0.13                   | 0.04 | 0.001 | 0.002          | -0.17                 | 0.04 | 0.000 | 0.000          | 0.05                             | 0.02 | 0.006 | 0.011          |
| Hobby <30mins (Ref. none)                         | -0.05                   | 0.03 | 0.130 | 0.167          | 0.00                  | 0.03 | 0.964 | 0.964          | 0.02                             | 0.01 | 0.162 | 0.219          |
| Hobby ≥30mins (Ref. none)                         | -0.18                   | 0.03 | 0.000 | 0.000          | -0.10                 | 0.03 | 0.000 | 0.000          | 0.09                             | 0.01 | 0.000 | 0.000          |
| Communication 30mins-2hrs (Ref. <30mins)          | -0.07                   | 0.03 | 0.009 | 0.015          | 0.03                  | 0.02 | 0.257 | 0.386          | 0.04                             | 0.01 | 0.001 | 0.002          |
| Communication ≥3hrs (Ref. <30mins)                | -0.01                   | 0.04 | 0.826 | 0.858          | 0.10                  | 0.04 | 0.005 | 0.015          | 0.06                             | 0.02 | 0.005 | 0.010          |
| COVID-19 news 30mins-2hrs (Ref. <30mins)          | 0.30                    | 0.02 | 0.000 | 0.000          | 0.48                  | 0.02 | 0.000 | 0.000          | -0.14                            | 0.01 | 0.000 | 0.000          |
| COVID -19 news ≥3hrs (Ref. <30mins)               | 0.59                    | 0.05 | 0.000 | 0.000          | 0.90                  | 0.04 | 0.000 | 0.000          | -0.29                            | 0.02 | 0.000 | 0.000          |
| Watching TV 30mins-2hrs (Ref. <30mins)            | -0.03                   | 0.04 | 0.428 | 0.502          | -0.03                 | 0.04 | 0.421 | 0.568          | 0.02                             | 0.02 | 0.221 | 0.284          |
| Watching TV ≥3hrs (Ref. <30mins)                  | 0.14                    | 0.05 | 0.010 | 0.016          | 0.04                  | 0.05 | 0.468 | 0.574          | -0.04                            | 0.02 | 0.114 | 0.171          |
| Listening radio/music 30mins-2hrs (Ref. <30mins)  | -0.09                   | 0.03 | 0.002 | 0.004          | -0.05                 | 0.03 | 0.062 | 0.140          | 0.03                             | 0.02 | 0.038 | 0.064          |
| Listening radio/music ≥3hrs (Ref. <30mins)        | -0.24                   | 0.05 | 0.000 | 0.000          | -0.11                 | 0.04 | 0.010 | 0.027          | 0.09                             | 0.02 | 0.000 | 0.000          |
| Internet/social media 30mins-2hrs (Ref. <30mins)  | 0.04                    | 0.03 | 0.104 | 0.140          | -0.01                 | 0.02 | 0.668 | 0.721          | 0.00                             | 0.01 | 0.850 | 0.850          |
| Internet/social media ≥3hrs (Ref. <30mins)        | 0.12                    | 0.05 | 0.008 | 0.014          | 0.02                  | 0.04 | 0.618 | 0.695          | 0.01                             | 0.02 | 0.773 | 0.835          |
| Number of observations                            | 239,005                 |      |       |                | 239,005               |      |       |                | 239,005                          |      |       |                |
| Number of individuals                             | 41,728                  |      |       |                | 41,728                |      |       |                | 41,728                           |      |       |                |

Notes: q values are p values controlling for the positive false discovery rate.
